# Supplementary material for: Maternal vaccination and protective immunity against Zika virus vertical transmission
Source: PubMed Central journal article supplement (PMC6908683; doi:10.1038/s41467-019-13589-1), 2019-12-12
Supplement: 41467_2019_13589_MOESM1_ESM.pdf [file 41467_2019_13589_MOESM1_ESM.pdf]

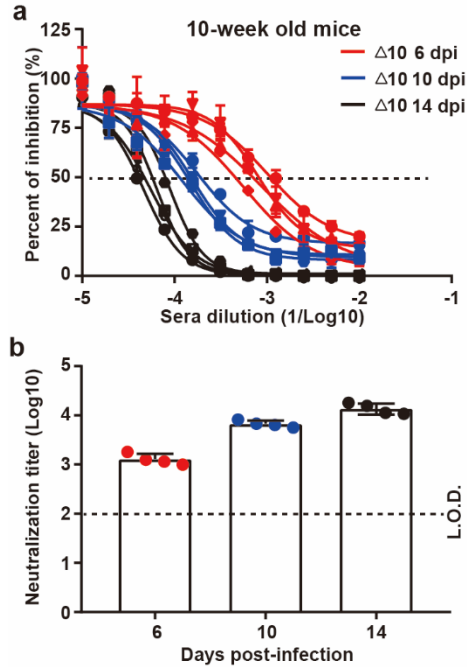

1

2 **Supplementary Figure 1** Antibody response from non-pregnant A129 female mice after 3'UTR-  
 3  $\Delta 10$ -LAV vaccination. Ten-week-old female A129 were subcutaneously immunized with  $10^3$  FFU  
 4 3'UTR- $\Delta 10$ -LAV. The mice were bled on days 6, 10, and 14 post-infection for measuring  
 5 neutralizing antibody titers in serum. **(a)** Neutralization curves using an mCherry ZIKV infecting  
 6 Vero cells. Error bars show the standard deviations from two technical replicates. Dotted line  
 7 indicates 50% inhibition of viral infection by mouse serum. **(b)** Neutralizing antibody titers on days  
 8 6, 10, and 14 post-infection ( $n = 4$  per group). Error bars represent standard deviations. Source  
 9 data are provided as a Source Data file.

10

11

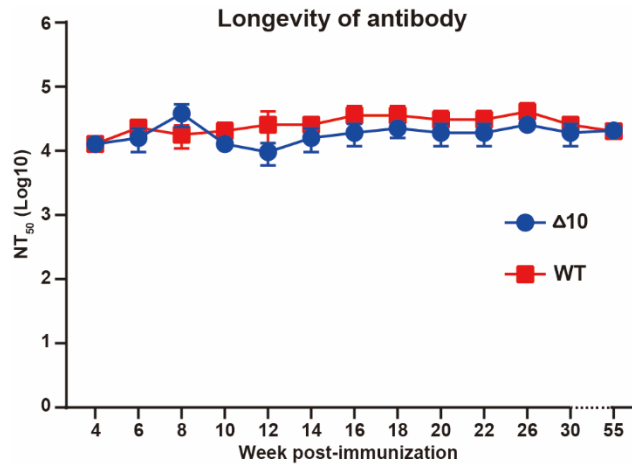

12

13 **Supplementary Figure 2** Durability of 3'UTR-Δ10-LAV-induced neutralizing antibody activities.

14 Ten-week-old A129 mice were immunized with 10<sup>3</sup> FFU 3'UTR-Δ10-LAV (n = 4) or WT ZIKV  
 15 PRVABC59 (n = 5). The vaccinated mice were bled biweekly from weeks 4 to 30 and finally at  
 16 week 55 for neutralizing antibody assays. Error bars represent standard deviations. Source data  
 17 are provided as a Source Data file.

18

19

20

21

22

23

24

25

26

27

28

29

30

31

32

33

34

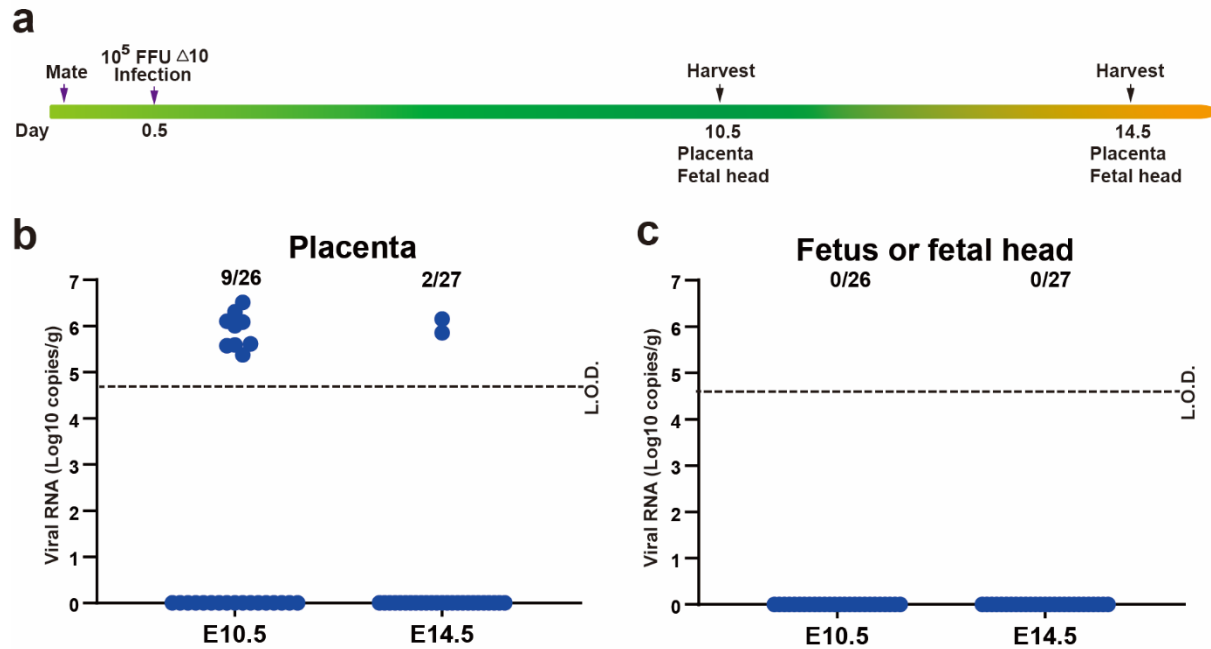

35

36

37 **Supplementary Figure 3** The safety of 3'UTR-Δ10-LAV in pregnant A129 mice when vaccinated  
 38 at E0.5. (a) Experimental scheme. Ten- to twelve-week-old pregnant mice were subcutaneously  
 39 infected with 10<sup>5</sup> FFU WT ZIKV and 3'UTR-Δ10-LAV (Δ10) at E0.5. Placenta and fetus/fetal heads  
 40 were harvested at E10.5 and E14.5, then samples were analyzed for viral by qPCR. (b) Viral RNA  
 41 load in placenta at E10.5 and E14.5. (c) Viral RNA load in fetus/fetal heads at E10.5 and E14.5.  
 42 Since the fetus was just developed at E10.5, the whole fetus was harvested for analysis. While  
 43 fetal heads were harvested and used for analysis at E14.5. L.O.D.: limit of detection. Source data  
 44 are provided as a Source Data file.

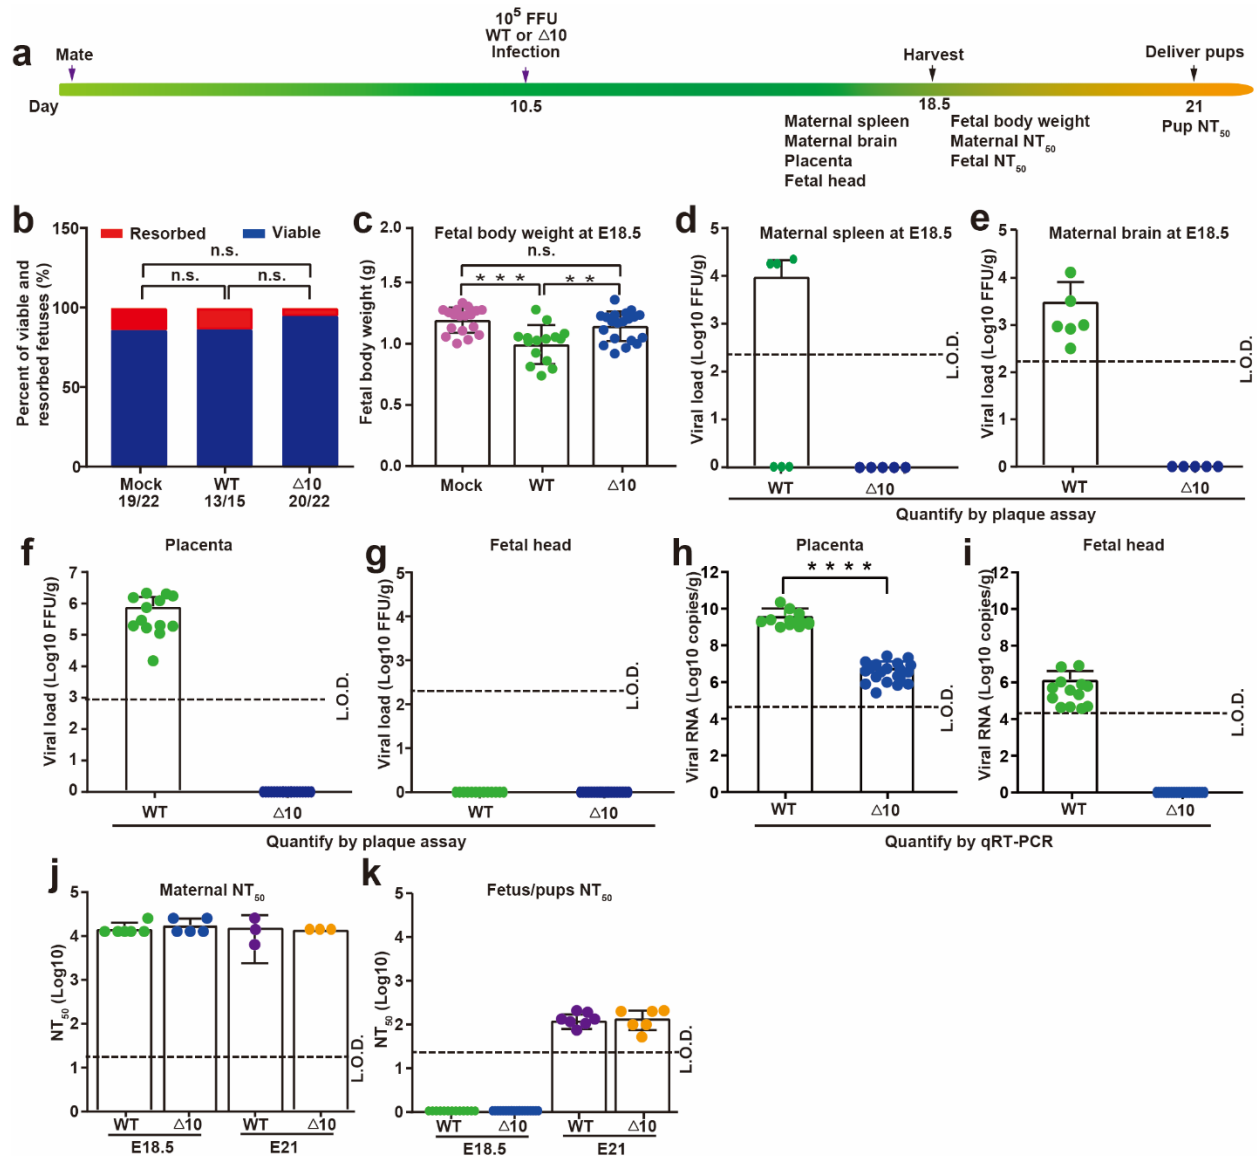

45

46 **Supplementary Figure 4** The safety of 3'UTR- $\Delta 10$ -LAV in pregnant A129 mice when vaccinated  
 47 at E10.5. (a) Experimental scheme. Ten- to twelve-week-old pregnant mice were subcutaneously  
 48 infected with  $10^5$  FFU WT ZIKV and 3'UTR- $\Delta 10$ -LAV ( $\Delta 10$ ) at E10.5. Maternal and fetal tissues  
 49 were harvested at E18.5 and analyzed for viral loads and neutralizing antibody titers (NT<sub>50</sub>). Pups  
 50 were delivered at E21 and measured for neutralizing antibody titers. (b) The percentage of fetuses  
 51 that were resorbed during pregnancy (n = 22 for placebo; n = 15 for WT ZIKV; n = 22 for  $\Delta 10$   
 52 vaccine; chi-square test [ $**p < 0.01$ ]). The numbers of normal fetuses and total fetuses are  
 53 presented below each group. (c) Fetal body weights at E18.5 for placebo, WT ZIKV, and  $\Delta 10$   
 54 groups. Asterisks indicate significant differences (one-way ANOVA). \*significant  $p < 0.5$ , non-  
 55 significant (n.s.)  $p > 0.5$ . Viral loads quantified by plaque assay at E18.5 are presented for  
 56 maternal spleen (d), brain (e), placenta (f), and fetal head (g). Viral RNA quantified by quantitative  
 57 RT-PCR (qRT-PCR) at E18.5 are presented for placenta (h) and fetal head (i). Asterisks indicate  
 58 significant differences (Mann-Whitney test). \*\*\*\*  $p < 0.0001$ . (j) Maternal neutralizing antibody titers  
 59 from WT ZIKV- and  $\Delta 10$ -infected pregnant mice at E18.5 and E21. (k) Neutralizing antibody titers  
 60 in fetuses from WT ZIKV- and  $\Delta 10$ -infected dams at E18.5 and E21. All neutralizing antibody titers

61 were measured by infecting Vero cells with an mCherry ZIKV. L.O.D.: limit of detection. Error bars  
62 represent standard deviations. Source data are provided as a Source Data file.

63

64

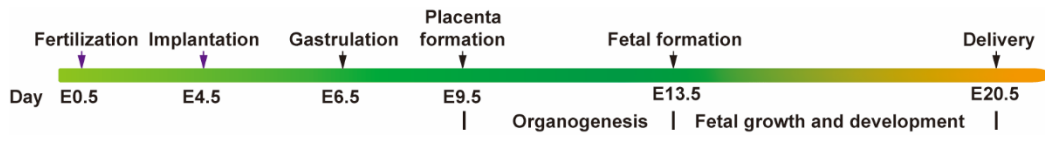

65

66 **Supplementary Figure 5** Developmental timeline of mouse pregnancy.

67

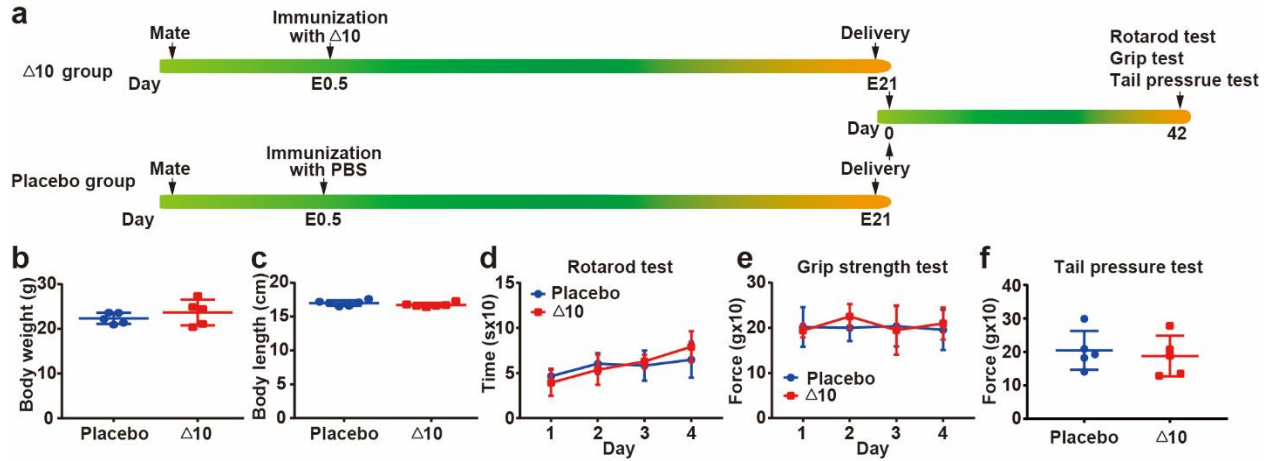

68

69 **Supplementary Figure 6** The effects of maternal vaccination with 3'UTR- $\Delta 10$ -LAV on offspring  
 70 development and behavior. **(a)** Experimental scheme. Ten- to twelve-week-old female A129 mice  
 71 were mated and immunized with  $10^3$  FFU 3'UTR- $\Delta 10$ -LAV or PBS placebo at E0.5. All pregnant  
 72 mice delivered pups at E21. When the pups reached six weeks of age, their body weights **(b)** and  
 73 body lengths **(c)** were measured. The pups were then subjected to three different behavior tests:  
 74 rotarod test **(d)**, grip strength test **(e)**, and tail pressure test **(f)**. As controls, age-matched female  
 75 mice were injected with PBS and subjected to the same analyses as described for the maternal  
 76 vaccination group. No significant differences (Mann-Whitney test) were observed in the  
 77 parameters measured in **(b-f)**. Error bars represent standard deviations. Source data are provided  
 78 as a Source Data file.

79

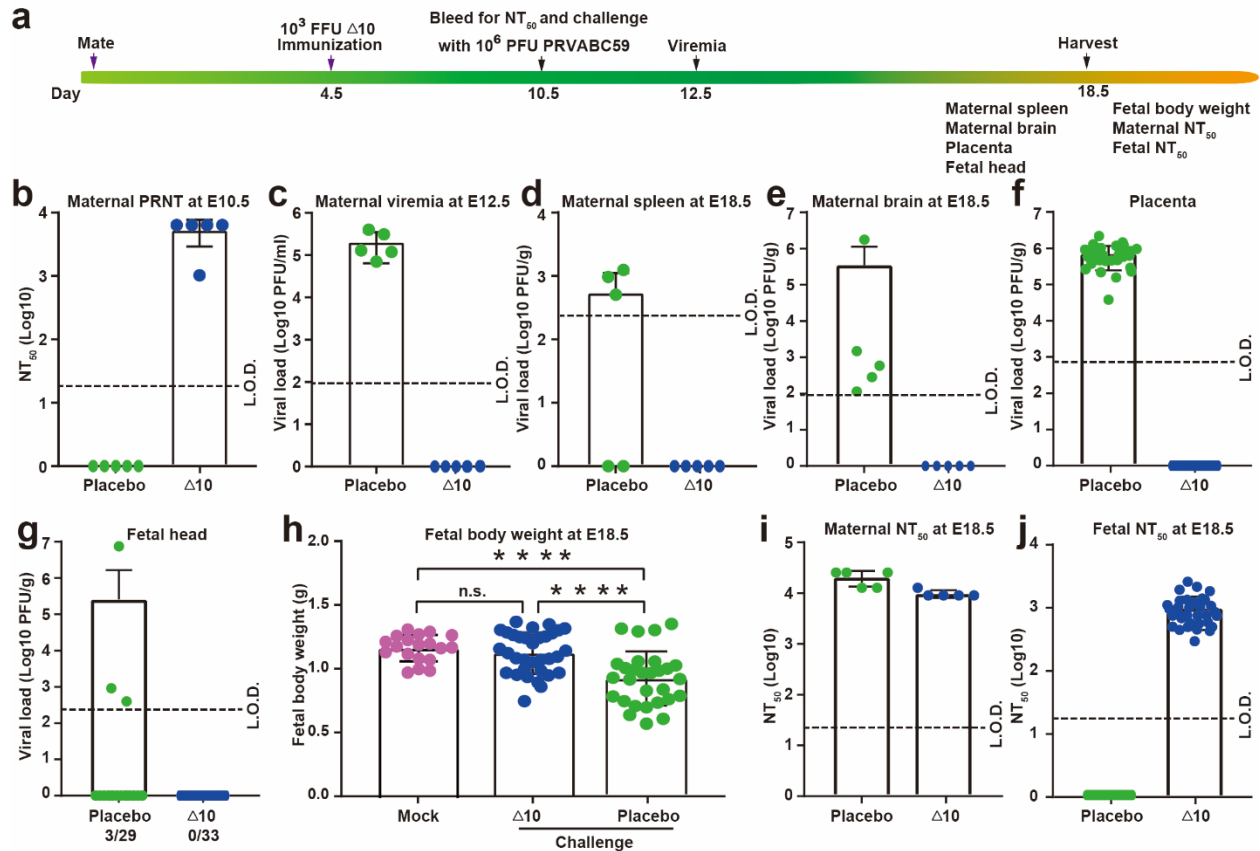

80

81 **Supplementary Figure 7** The efficacy of 3'UTR-Δ10-LAV in pregnant A129 mice when  
 82 immunized at E4.5. (a) Experimental scheme. Ten- to twelve-week-old pregnant mice were  
 83 subcutaneously immunized with 10<sup>3</sup> FFU 3'UTR-Δ10-LAV (Δ10) or PBS placebo at E4.5. At E10.5,  
 84 the pregnant mice were bled for NT<sub>50</sub> measurement and subcutaneously challenged with 10<sup>6</sup> PFU  
 85 of ZIKV PRVABC59. Viremia was quantified by at E12.5. Maternal and fetal tissues were  
 86 harvested for analysis at E18.5. (b) Neutralizing antibody titers from PBS- or Δ10-immunized  
 87 pregnant mice at E10.5. (c) Viremia at E12.5. Viral loads at E18.5 are presented for maternal  
 88 spleen (d), brain (e), placenta (f), and fetal head (g). (h) Fetal body weights at E18.5 from three  
 89 experimental groups: no immunization or challenge (mock; *left panel*), Δ10-vaccinated with  
 90 challenge (*middle panel*), and PBS-immunized with challenge (*right panel*). Asterisks indicate  
 91 significant differences (one-way ANOVA). \*\*\*\**p*<0.0001, non-significant (n.s.) *p*>0.5). (i) Maternal  
 92 neutralizing antibody titers from dams at E18.5. (j) Fetal neutralizing antibody titers from fetuses  
 93 at E18.5. Error bars represent standard deviations. Source data are provided as a Source Data  
 94 file.

95



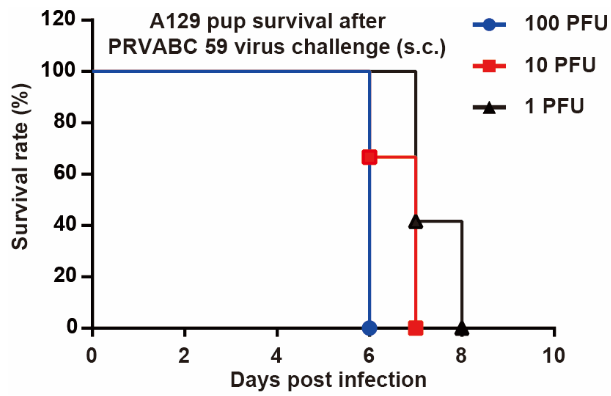

96

97

98 **Supplementary Figure 8** Survival curve of A129 neonates after ZIKV PRVABC59 infection.

99 Naïve one-day-old A129 pups were subcutaneously infected with 1, 10, or 100 PFU ZIKV

100 PRVABC59. The infected mice were monitored for survival (n = 12 per group). Source data are

101 provided as a Source Data file.

102

103

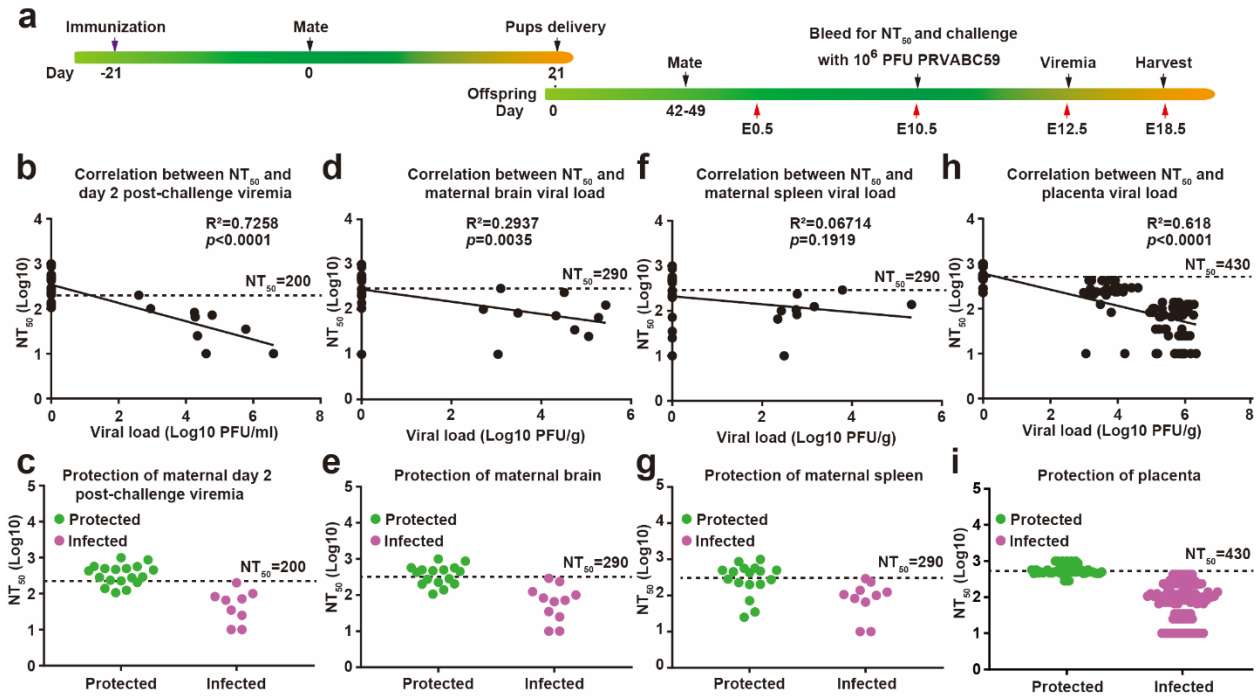

104

105 **Supplementary figure 9** The minimal neutralizing antibody titers (NT<sub>50</sub>) required for protection of  
 106 pregnant A129 mice from apparent ZIKV infection. **(a)** Experimental scheme. Ten- to twelve-  
 107 week-old female mice were subcutaneously immunized with 10<sup>3</sup> FFU of 3'UTR-Δ10-LAV (Δ10) or  
 108 PBS on day 21 before pregnancy. The pregnant dams gave birth to pups at full term. The female  
 109 pups were mated with male mice at six- to seven-week-old. At E10.5, these pregnant mice were  
 110 bled for neutralizing antibody measurement and subcutaneously challenged with 10<sup>6</sup> FFU ZIKV  
 111 PRVABC59. The challenged pregnant mice were measured for viremia at E12.5. The maternal  
 112 and fetal organs were harvested for viral load analysis at E18.5. **(b)** Correlation analysis between  
 113 NT<sub>50</sub> titers at E10.5 and viremia at E12.5. **(c)** Comparison of NT<sub>50</sub> titers and viremia between the  
 114 protected and infected mice from **(b)**. Correlation analyses between organ viral loads (detected  
 115 at E18.5) and NT<sub>50</sub> titers (measured at E10.5) are presented for maternal brain **(d, e)**, spleen **(f,**  
 116 **g)**, and placenta **(h, i)**. The dotted lines indicate the minimal NT<sub>50</sub> titers required for protection  
 117 against viremia and organ infections. Source data are provided as a Source Data file.

118

119

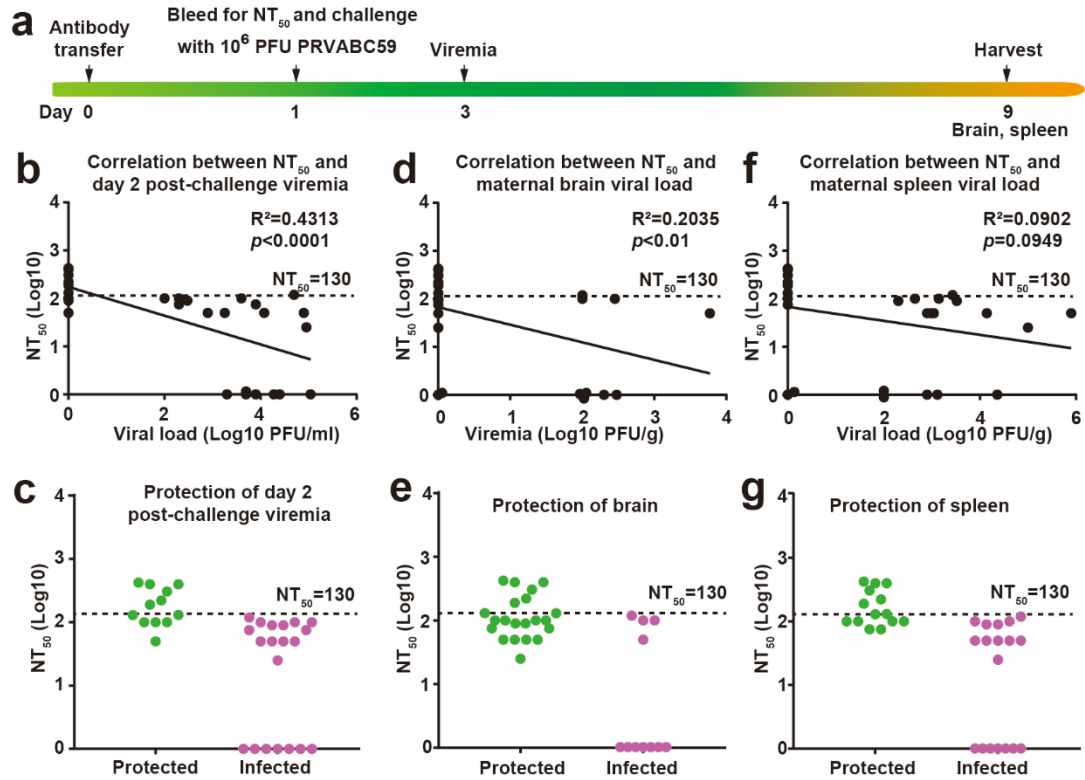

120

121 **Supplementary Figure 10** The minimal neutralizing antibody titers (NT<sub>50</sub>) required for protection  
 122 of non-pregnant A129 mice from apparent ZIKV infection. **(a)** Experimental scheme for passive  
 123 antibody transfer and efficacy test. Ten- to twelve-week-old female mice were passively  
 124 transferred with various amounts neutralizing antibodies on day 0. On day 1, the mice were bled  
 125 for neutralizing antibody measurement and subcutaneously challenged with 10<sup>6</sup> FFU ZIKV-  
 126 PRVABC59. On day 3, the challenged mice were measured for viremia. On day 9, the infected  
 127 mice were sacrificed and measured for organ viral loads. **(b)** Correlation analysis between NT<sub>50</sub>  
 128 titers on day 1 and viremia on day 3. **(c)** Plot of viremia levels versus different groups of NT<sub>50</sub>  
 129 titers from **(b)**. Correlation analyses between organ viral loads (detected on day 9) and NT<sub>50</sub> titers  
 130 (measured on day 1) are presented for maternal brain **(d, e)** and spleen **(f, g)**. The dotted lines  
 131 indicate the minimal NT<sub>50</sub> titers required for protection against viremia and organ infections.  
 132 Source data are provided as a Source Data file.

133

134

135

136

137

138

139

140

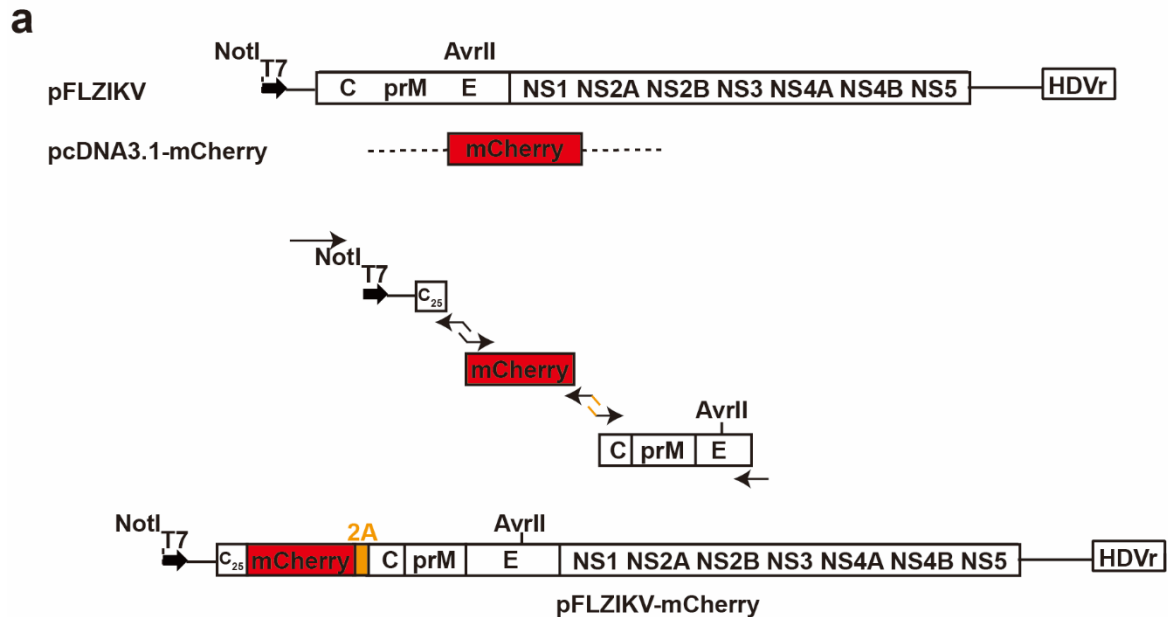

**b**

| Primer name                | Sequence (5'-3')                                                        |
|----------------------------|-------------------------------------------------------------------------|
| pACYC-14437-F              | GCCTACCCGGAAGTACTGAGTGTCT                                               |
| C <sub>25</sub> -mCherry-F | GTAGCCCGTGTGAGCATGGTGTGAGCAAGGGCGAG                                     |
| C <sub>25</sub> -mCherry-R | GCCCTTGCTCACCATGCTCACACGGGCTACTCC                                       |
| mCherry-2A-R               | GACTCGACGTCTCCCGCCAGCTTGAGAAGGTCAAATTCAACAGCTGCGTACGC<br>TTGTACAGCTCGTC |
| 2A-Capsid-F                | GCTGGCGGGAGACGTGAGTCCAACCCTGGGCCAATGAAAAACCCAAAGAAGAA                   |
| Zika-1818R                 | TTGCACCATCCATCTCAGCCTCCAGAGCTCCAGC                                      |

F, Forward; R, Reverse.

142

143 **Supplementary Figure 11 Construction of pFLZIKV-mCherry reporter virus. (a)**  
 144 Construction of cDNA mCherry reporter ZIKV. To facilitate neutralizing antibody testing, ZIKV-  
 145 mCherry reporter virus was constructed. Standard PCR procedure was performed to construct  
 146 pFLZIKV-mCherry. First, a standard overlap PCR was used to create a cassette containing  
 147 “NotI-T7 promoter-5’UTR-N-terminal 25 amino acids of capsid protein-mCherry gene-FMDV2A-  
 148 authentic initiation codon of capsid protein to the unique AvrII site in E protein”. Fragment  
 149 covering “NotI to 5’UTR-N-terminal 25 amino acids of capsid protein” was amplified with the  
 150 primer pACYC-14437F and C<sub>25</sub>-mCherry-R using the pFLZIKV as a template. Fragment having  
 151 “mCherry gene” was amplified from pcDNA3.1-mCherry by primers C<sub>25</sub>-mCherry-F and  
 152 mCherry-2A-R. Fragment spanning “the authentic initiation codon of capsid protein to AvrII  
 153 unique site in E protein” (located at nucleotide position 1533 of the viral genome GenBank  
 154 number KU955593.1)) was amplified with primer 2A-Capsid-F and Zika-1818C using the  
 155 pFLZIKV as a template. The primer sequences are presented in Table 1. The three fragments  
 156 were fused together with primers pACYC-14437F and Zika-1818C. Next, the fragment from NotI  
 157 to AvrII was engineered at the corresponding sites into pFLZIKV, resulting in plasmid pFLZIKV-  
 158 mCherry. Compared with the wild-type pFLZIKV, pFLZIKV-mCherry contained an extra  
 159 fragment (representing the first 25 amino acids of C protein-a mCherry gene-FMDV2A) between

160 the 5'UTR and the complete ORF of the viral genome. All the constructs were verified by DNA  
161 sequencing. The rescue of the virus could follow published protocol <sup>1</sup>. (b) Primers used for the  
162 construction of cDNA mCherry reporter ZIKV.

163 **Related to Figure 1.**

164

165 1 Shan, C., Xie, X. & Shi, P. Y. Reverse Genetics of Zika Virus. *Methods Mol Biol* **1602**, 47-  
166 58, doi:10.1007/978-1-4939-6964-7\_4 (2017).

167

168
